# Supplementary material for: DNA-mediated phase transfer of DNA-functionalized quantum dots using reverse micelles
Source: Royal Society of Chemistry journal article supplement (doi:10.1039/c4ra09683e), 2014-01-01
Supplement: c4ra09683e1.pdf [file c4ra09683e1.pdf]

## Electronic Supplementary Information

# DNA-Mediated Phase Transfer of CdTe Quantum Dots Using Reverse Micelles

Tomoharu Kato,<sup>†</sup> Yuhei Fujimoto,<sup>†</sup> Ayane Shimomura<sup>†</sup> and Tatsuo Maruyama<sup>†,\*</sup>

<sup>†</sup> Department of Chemical Science and Engineering, Graduate School of Engineering, Kobe University, 1-1 Rokkodaicho, Nada-ku, Kobe 657-8501, Japan.

\*E-mail: tmarutcm@crystal.kobe-u.ac.jp

## Experimental

### Materials

Dilauroyl phosphatidylcholine (DLPC, 99% purity) was purchased from NOF Corporation (Tokyo, Japan). Synthesized DNA oligonucleotides were purchased from Tsukuba Oligo Service Co., Ltd. (Tsukuba, Japan). Tris(2-carboxyethyl)phosphine hydrochloride was purchased from Tokyo Chemical Industry Co., Ltd. (Tokyo, Japan). Other chemicals were purchased from Wako Pure Chemicals (Osaka, Japan). Error bars in figures represent standard deviations.

### Preparation of DNA surfactant

A DNA surfactant was synthesized according to a method reported previously.<sup>1, 2</sup> Briefly, 5'-aminated DNA oligonucleotide (0.5 mM) in a phosphate buffer (50 mM, 10 µL) was mixed with a

dimethylsulfoxide solution (54  $\mu$ L) containing oleic acid *N*-hydroxysuccinimide ester (1 mM). Following incubation of the mixture at 40  $^{\circ}$ C for 24 h, the synthesized 5'-oleoyl DNA oligonucleotide (DNA surfactant) was purified by high-performance liquid chromatography using an ODS column.<sup>1,2</sup>

Table S1. Nucleotide sequences of DNA surfactants and DNA-QDs

| <b>Name</b>      | <b>Sequence</b>           |
|------------------|---------------------------|
| DNA-surfactant 1 | Oleoyl-5'-CTCGTCGTGTTA-3' |
| DNA-surfactant 2 | Oleoyl-5'-GCTCTGGCTAAA-3' |
| DNA-CdTe QDs     | HS-5'-TAACACGACGAG-3'     |

#### Preparation of CdTe QDs in aqueous solution

Mercaptopropionic acid (MPA)-capped CdTe QDs were synthesized according to the literature.<sup>3</sup> Te powder (0.2 mmol), NaBH<sub>4</sub> (1 mmol), and H<sub>2</sub>O (5 mL) were mixed and bubbled with N<sub>2</sub> for 60 min to obtain a NaHTe solution. CdCl<sub>2</sub> (4 mmol) and MPA (0.6 mmol) were added to water (50 mL), and the pH value of the solution was adjusted to 10.3 using NaOH (1 M). The solution was bubbled with N<sub>2</sub> for 30 min. Then, 800  $\mu$ L of NaHTe solution was added. The resulting mixture was refluxed at 90  $^{\circ}$ C for 3–90 h under open air conditions and dialyzed against Milli-Q water for 2 h. The diameter of the CdTe QDs was determined according to the literature.<sup>4</sup>

The Cd and Te concentrations in the CdTe QDs aqueous solution were measured using flame

atomic absorption spectrometry (FAAS; Z-2310; Hitachi High-Technologies Co., Tokyo, Japan).

The concentration of CdTe QDs was calculated based on the atomic Cd and Te concentrations in the QDs solution and the QD diameter.

#### Functionalization of CdTe QDs with SH-DNA

CdTe QDs were functionalized with SH-5'-DNA (5'-thiolated-DNA) according to the literature.<sup>5</sup>

Thiolated-DNA oligonucleotides (5'-HS-TAACACGACGAG-3') (100  $\mu$ M) were treated with 100  $\mu$ M tris(2-carboxyethyl)phosphine hydrochloride for 1 h at room temperature. This solution was then added to the synthesized CdTe QDs solution (SH-DNA:CdTe QDs (molar ratio) of 1:1, 1:2, 1:4, or 1:8). The mixture was incubated overnight. A NaCl solution (1 M) was slowly added to the mixture to achieve a concentration of 100 mM.

#### Extraction of DNA-QDs from an aqueous phase to an organic phase

The extraction of DNA-QDs using reverse micelles was performed as follows. Typically, the aqueous phase comprised tris-HCl buffer (pH 8, 25 mM), KCl (300 mM), DNA-QDs (75 nM), and DNA surfactant **1** (300 nM). The organic phase comprised 2,2,4-trimethyl pentane, DLPC (15 mM), and 1-hexanol (390 mM). First, the organic phase (1 mL) was added to the aqueous phase (1 mL). After the two phases were gently stirred at 25 °C for 3 h, the fluorescence of the DNA-QDs in the organic and aqueous phases was measured at 25 °C using a fluorescence spectrophotometer (FP-

8200 fluorescence spectrometer; Jasco, Tokyo, Japan). The excitation wavelength was 365 nm.

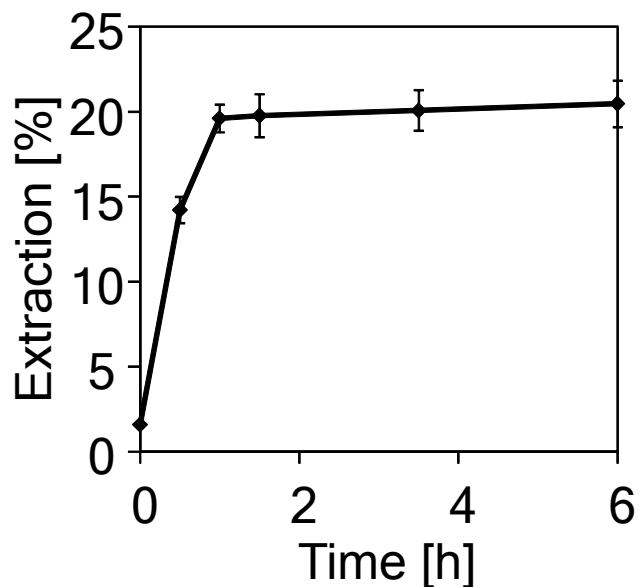

Fig. S1. Effect of extraction time on the extraction of DNA-QDs (QDs, 3 nm in diameter). The aqueous phase (tris-HCl buffer (pH 8, 25 mM), KCl (300 mM)) contained DNA surfactant 1 (400 nM) and DNA-QDs (100 nM), and the organic phase (2,2,4-trimethylpentane) contained DLPC (10 mM) and 1-hexanol (3 vol.%). The DNA/QD ratio was set at 4. The extraction and fluorescence measurements were carried out at 25 °C. Experiments were conducted in triplicate. Error bars represent standard deviations.

## References

1. T. Maruyama, T. Hosogi and M. Goto, *Chem Commun*, 2007, 4450–4452.
2. T. Maruyama, H. Yamamura, M. Hiraki, Y. Kemori, H. Takata and M. Goto, *Colloids Surf B*, 2008, **66**, 119–124.
3. S. H. Xu, C. L. Wang, H. Zhang, Z. Y. Wang, B. Yang and Y. P. Cui, *Nanotechnology*, 2011, **22**.

4. W. W. Yu, L. Qu, W. Guo and X. Peng, *Chem. Mater.* 2003, **15**, 2854–2860.
5. F. Li, H. Q. Zhang, B. Dever, X. F. Li and X. C. Le, *Bioconjug. Chem.*, 2013, **24**, 1790–1797.
